# Supplementary material for: Facile Synthesis of Multi-Emission Nitrogen/Boron Co-Doped Carbon Dots from Lignin for Anti-Counterfeiting Printing
Source: MDPI journal article supplement (doi:10.3390/polym14142779), 2022-07-07
Supplement: s1 [file s1]

# Supporting Materials: Facile Synthesis of Multi-Emission Nitrogen/Boron Co-doped Carbon Dots from Lignin for Anti-Counterfeiting Printing

Xuexin Gu, Lingli Zhu, Dekui Shen and Chong Li

## Calculation of Fluorescence Lifetime

The time-resolved photoluminescence (TRPL) decay curves are fitted by a multiexponential function  $R(t)$  (eq. (1)) and the average lifetime ( $\tau_{avg}$ ) can be calculated according to eq. (2). [1, 2]

$$R(t) = B_1 e^{-t/\tau_1} + B_2 e^{-t/\tau_2} \dots + B_n e^{-t/\tau_n} \quad (1)$$

$$\tau_{avg} = (B_1 \tau_1^2 + B_2 \tau_2^2 + \dots + B_n \tau_n^2) / (B_1 \tau_1 + B_2 \tau_2 + \dots + B_n \tau_n) \quad (2)$$

Here,  $\tau_1, \tau_2, \dots, \tau_n$  represent fluorescence lifetimes and  $B_1, B_2, \dots, B_n$  represent percentages of  $\tau_1, \tau_2, \dots, \tau_n$ , respectively.

## DFT Calculation

All the calculations are carried out using Gaussian 09 suite of program. The ground-state geometries of QDs were firstly optimized by DFT2-3 B3LYP (Becke's three-parameter hybrid function with the non-local correlation of Lee-Yang-Parr5) method with the Pople 6-31G(d) basis set (B3LYP/6-31G(d)). [3] The dangling carbon bonds are passivated by hydrogen atoms. The molecular orbits of possible moieties were imported at the B3LYP/6-31 G (d, p) level based on optimized ground-state geometries. [4, 5] Multiwfn is used for post-processing of computed resulting images. [6]

**Table S1.** The quantitative analysis results of XPS.

| Sample | C(%)  | O(%)  | N(%) | B(%) | O/C(%) | N/C(%) | B/C(%) | QY1(%) | QY2(%) | QY3(%) |
|--------|-------|-------|------|------|--------|--------|--------|--------|--------|--------|
| CDs-1  | 57.60 | 41.33 | 0.93 | 0.14 | 0.72   | 0.02   | 0.00   | 0.36   | 0.23   | 0.17   |
| CDs-2  | 57.21 | 40.53 | 1.91 | 0.35 | 0.71   | 0.03   | 0.01   | 0.21   | 2.92   | 0.75   |
| CDs-3  | 58.31 | 37.11 | 3.82 | 0.76 | 0.64   | 0.07   | 0.01   | 0.10   | 7.40   | 4.66   |
| CDs-4  | 55.67 | 41.06 | 2.84 | 0.43 | 0.74   | 0.05   | 0.01   | 0.22   | 3.21   | 3.89   |

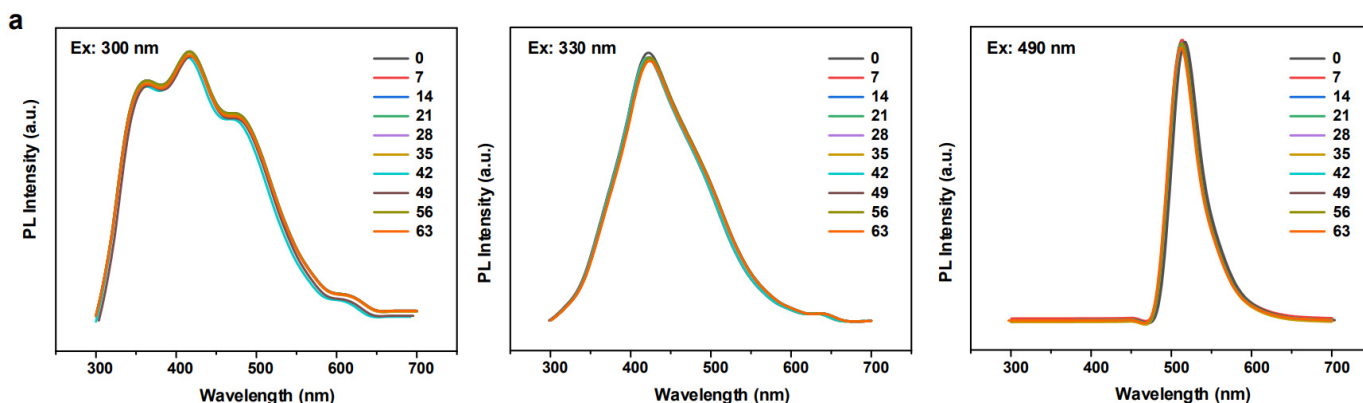

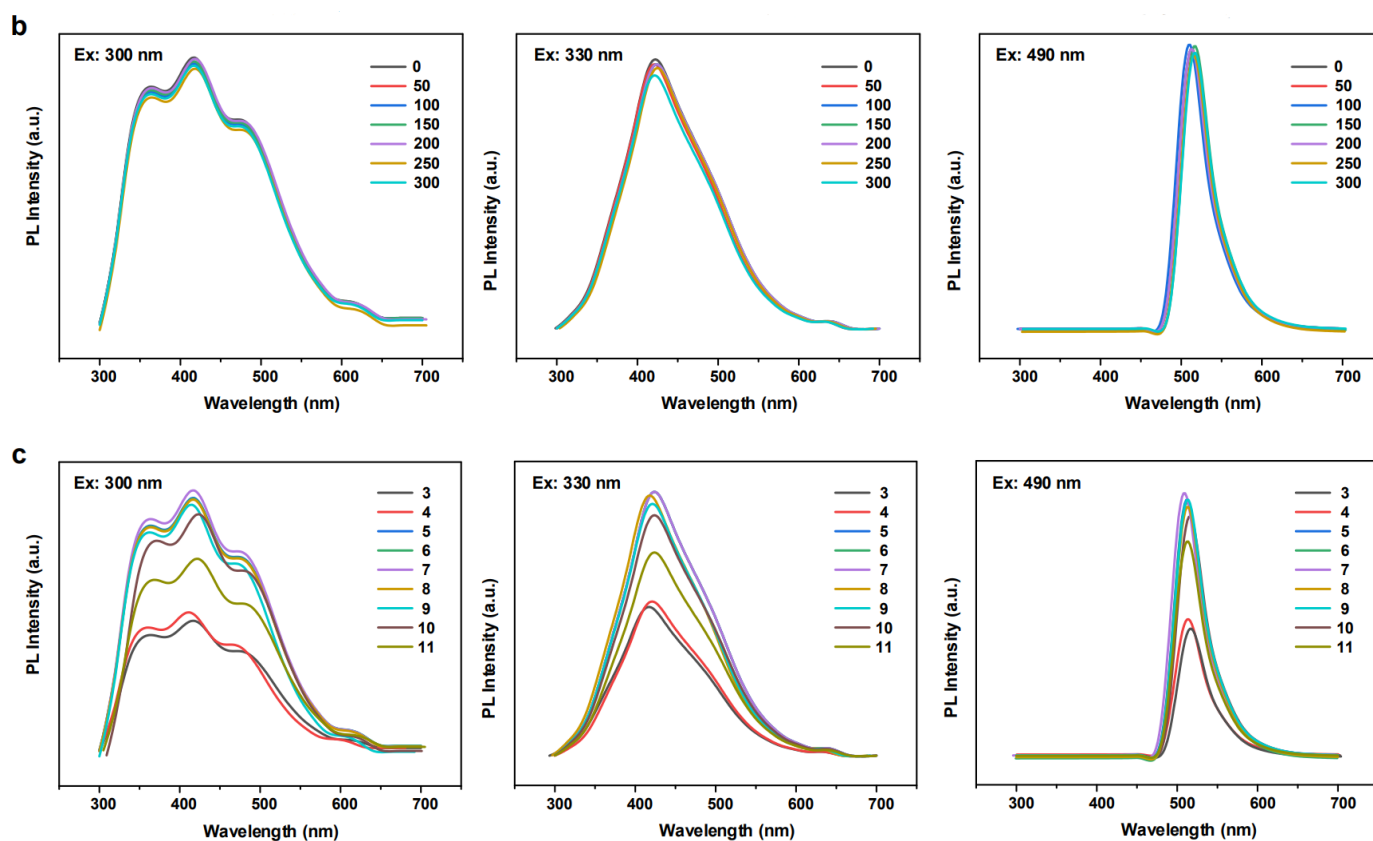

**Figure S1.** Stability test of CDs-3. Variation of PL intensity of CDs-3 aqueous solution (a) stored at room temperature from 0 to 63 days, (b) heated at different temperatures from 0 to 300 °C for 30 min, and (c) dispersed at different pH values from 3 to 11.
